# Supplementary material for: Differences in Functional Capacity between Oncologic and Non-Oncologic Populations: Reference Values
Source: MDPI journal article supplement (doi:10.3390/healthcare12030318), 2024-01-25
Supplement: s1 [file s1]

**Supplementary Table S1.** Percentiles of MGS, kg of Muscle and 5STS rel.

| Women                           | Age group          | Percentiles |       |      |      |      |      |      |
|---------------------------------|--------------------|-------------|-------|------|------|------|------|------|
|                                 |                    | 5th         | 10th  | 25th | 50th | 75th | 90th | 95th |
| MGS                             | G1=50-59<br>(n=73) | 16.0        | 19.2  | 21.9 | 24.2 | 27.4 | 30.2 | 33.0 |
|                                 | G2=60-69<br>(n=58) | 14.9        | 17.2  | 20.5 | 23.3 | 25.8 | 27.9 | 30.2 |
|                                 | G3=70-79<br>(n=18) | 14.0        | 14.4  | 15.9 | 18.6 | 21.6 | 24.7 | 25.9 |
|                                 | G4=80-89<br>(n=3)  | 18.8        | 18.8  | 19.0 | 19.3 | 19.4 | 19.5 | 19.5 |
| Kg_Muscle                       | G1=50-59<br>(n=73) | 18.8        | 19.9  | 20.7 | 22.6 | 24.3 | 26.4 | 28.7 |
|                                 | G2=60-69<br>(n=58) | 17.8        | 18.6  | 19.8 | 22.1 | 23.7 | 26.1 | 27.8 |
|                                 | G3=70-79<br>(n=18) | 17.3        | 17.6  | 18.3 | 19.8 | 22.1 | 23.0 | 23.8 |
|                                 | G4=80-89<br>(n=3)  | 17.9        | 18.1  | 18.7 | 19.7 | 20.8 | 21.5 | 21.7 |
| STS (s)                         | G1=50-59<br>(n=73) | 19.3        | 16.0  | 14.1 | 12.7 | 11.0 | 9.7  | 8.8  |
|                                 | G2=60-69<br>(n=58) | 23.7        | 18.9  | 15.2 | 13.1 | 11.6 | 10.5 | 10.1 |
|                                 | G3=70-79<br>(n=18) | 24.0        | 23.4  | 18.8 | 14.3 | 12.6 | 11.5 | 11.0 |
|                                 | G4=80-89<br>(n=3)  | 32.2        | 30.7  | 26.2 | 18.7 | 16.2 | 14.7 | 14.2 |
| 5STS rel. (W·kg <sup>-1</sup> ) | G1=50-59<br>(n=73) | 1.4         | 1.6   | 1.9  | 2.2  | 2.5  | 3.0  | 3.2  |
|                                 | G2=60-69<br>(n=58) | 1.2         | 1.4   | 1.7  | 2.0  | 2.3  | 2.6  | 2.7  |
|                                 | G3=70-79<br>(n=18) | 1.0         | 1.086 | 1.40 | 1.71 | 2.0  | 2.2  | 2.6  |
|                                 | G4=80-89<br>(n=3)  | 0.8         | 0.9   | 1.0  | 1.3  | 1.6  | 1.8  | 1.9  |

## Men

|                                |                    | Mean | SD   | Min  | Max   | Median | Q1   | Q3   |
|--------------------------------|--------------------|------|------|------|-------|--------|------|------|
| MGS                            | G1=50-59<br>(n=40) | 29.9 | 32.4 | 39.6 | 44.3  | 47.8   | 53.0 | 57.8 |
|                                | G2=60-69<br>(n=59) | 29.3 | 31.1 | 35.7 | 39.10 | 45.7   | 49.9 | 51.6 |
|                                | G3=70-79<br>(n=27) | 23.7 | 25.8 | 29.4 | 33.7  | 36.9   | 40.6 | 41.4 |
|                                | G4=80-89<br>(n=2)  | 25.8 | 26.1 | 27.2 | 29.1  | 30.9   | 31.9 | 32.2 |
| Kg_Muscle                      | G1=50-59<br>(n=40) | 25.6 | 26.4 | 29.4 | 32.4  | 37.1   | 39.7 | 40.9 |
|                                | G2=60-69<br>(n=59) | 24.8 | 25.7 | 28.1 | 31.6  | 34.4   | 35.9 | 37.0 |
|                                | G3=70-79<br>(n=27) | 20.1 | 22.5 | 24.9 | 27.2  | 30.6   | 31.9 | 33.3 |
|                                | G4=80-89<br>(n=2)  | 26.6 | 26.7 | 26.9 | 27.3  | 27.8   | 27.9 | 28.0 |
| STS (s)                        | G1=50-59<br>(n=40) | 18.3 | 16.1 | 13.7 | 10.9  | 10.0   | 9.0  | 8.6  |
|                                | G2=60-69<br>(n=59) | 18.8 | 17.1 | 13.8 | 12.3  | 11.0   | 9.3  | 8.8  |
|                                | G3=70-79<br>(n=27) | 22.7 | 20.0 | 16.4 | 14.9  | 12.5   | 11.4 | 10.7 |
|                                | G4=80-89<br>(n=2)  | 20.6 | 20.1 | 18.8 | 16.5  | 14.3   | 13.0 | 12.5 |
| 5STS_rel. (W·kg <sup>1</sup> ) | G1=50-59<br>(n=40) | 1.7  | 2.1  | 2.5  | 3.1   | 3.5    | 3.9  | 4.0  |
|                                | G2=60-69<br>(n=59) | 1.9  | 1.9  | 2.3  | 2.7   | 3.1    | 3.6  | 3.7  |
|                                | G3=70-79<br>(n=27) | 1.3  | 1.6  | 1.9  | 2.2   | 2.4    | 2.7  | 2.8  |
|                                | G4=80-89<br>(n=2)  | 1.4  | 1.5  | 1.6  | 1.9   | 2.2    | 2.4  | 2.4  |

MGS =Manual Grip strength, Kg\_Muscle=Kilograms of muscle, 5STS =5 time Sit to Stand Test, 5STS\_rel =Relative power
